# Supplementary material
Source: ML conference proceedings conference paper supplement (https://openreview.net/forum?id=BoMZmzfTg1)
Supplement: supplementary_material [file attachment]

Case #FLARETs\_0053 (sclice #34)

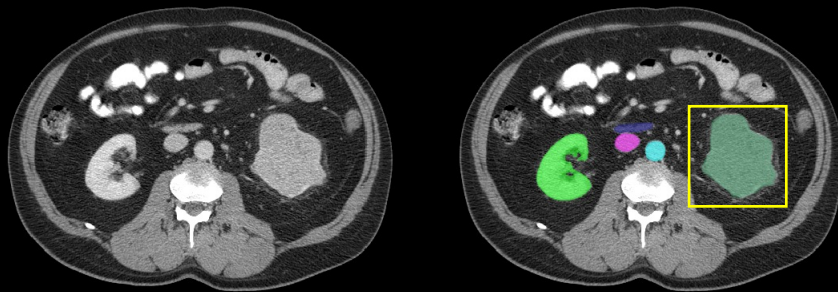

DSC: 88.44

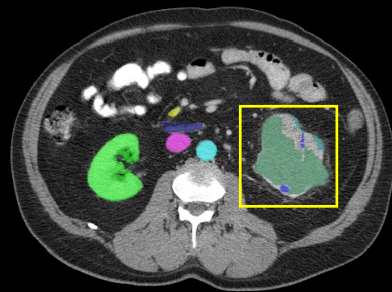

DSC: 89.43

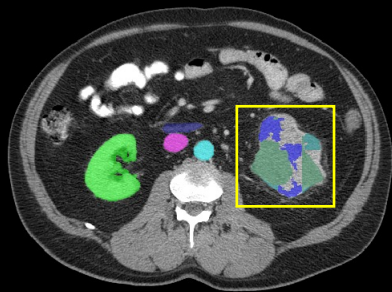

Case #FLARETs\_0038 (sclice #196)

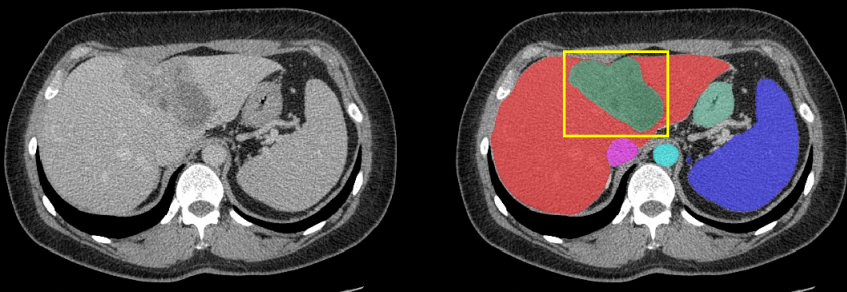

DSC: 85.88

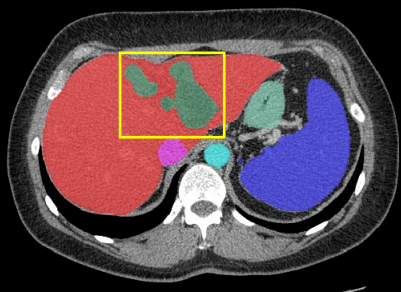

DSC: 88.68

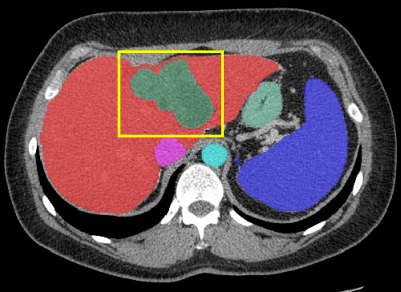

Case #FLARETs\_0067 (sclice #21)

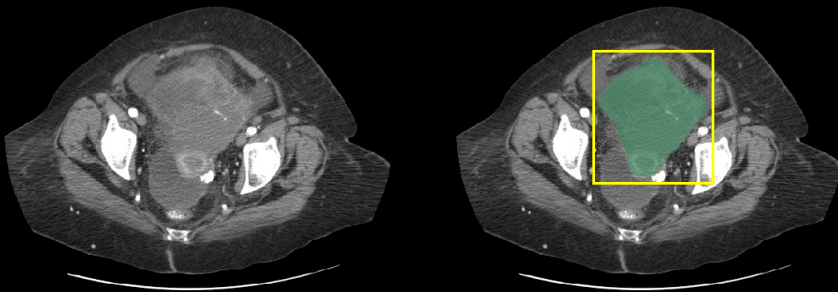

DSC: 69.64

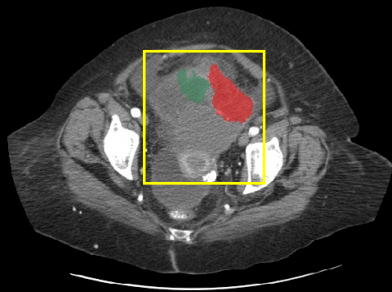

DSC: 73.70

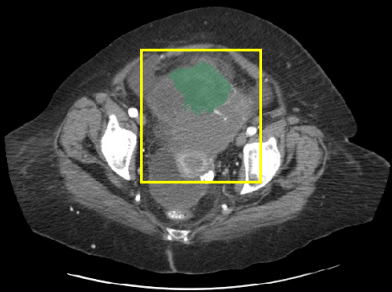

Case #FLARETs\_0021 (sclice #110)

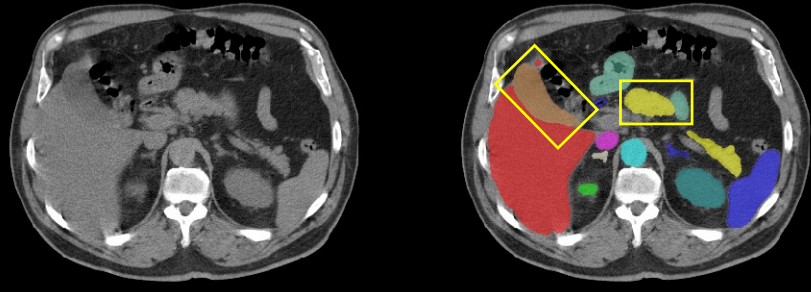

DSC: 59.12

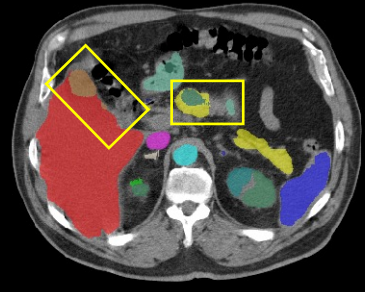

DSC: 71.29

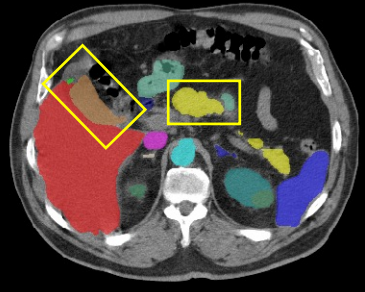

Image

Ground Truth

Model trained with  
unlabeled data

Model trained w/o  
unlabeled data
