# Supplementary material
Source: ML conference proceedings conference paper supplement (https://openreview.net/forum?id=BoMZmzfTg1)

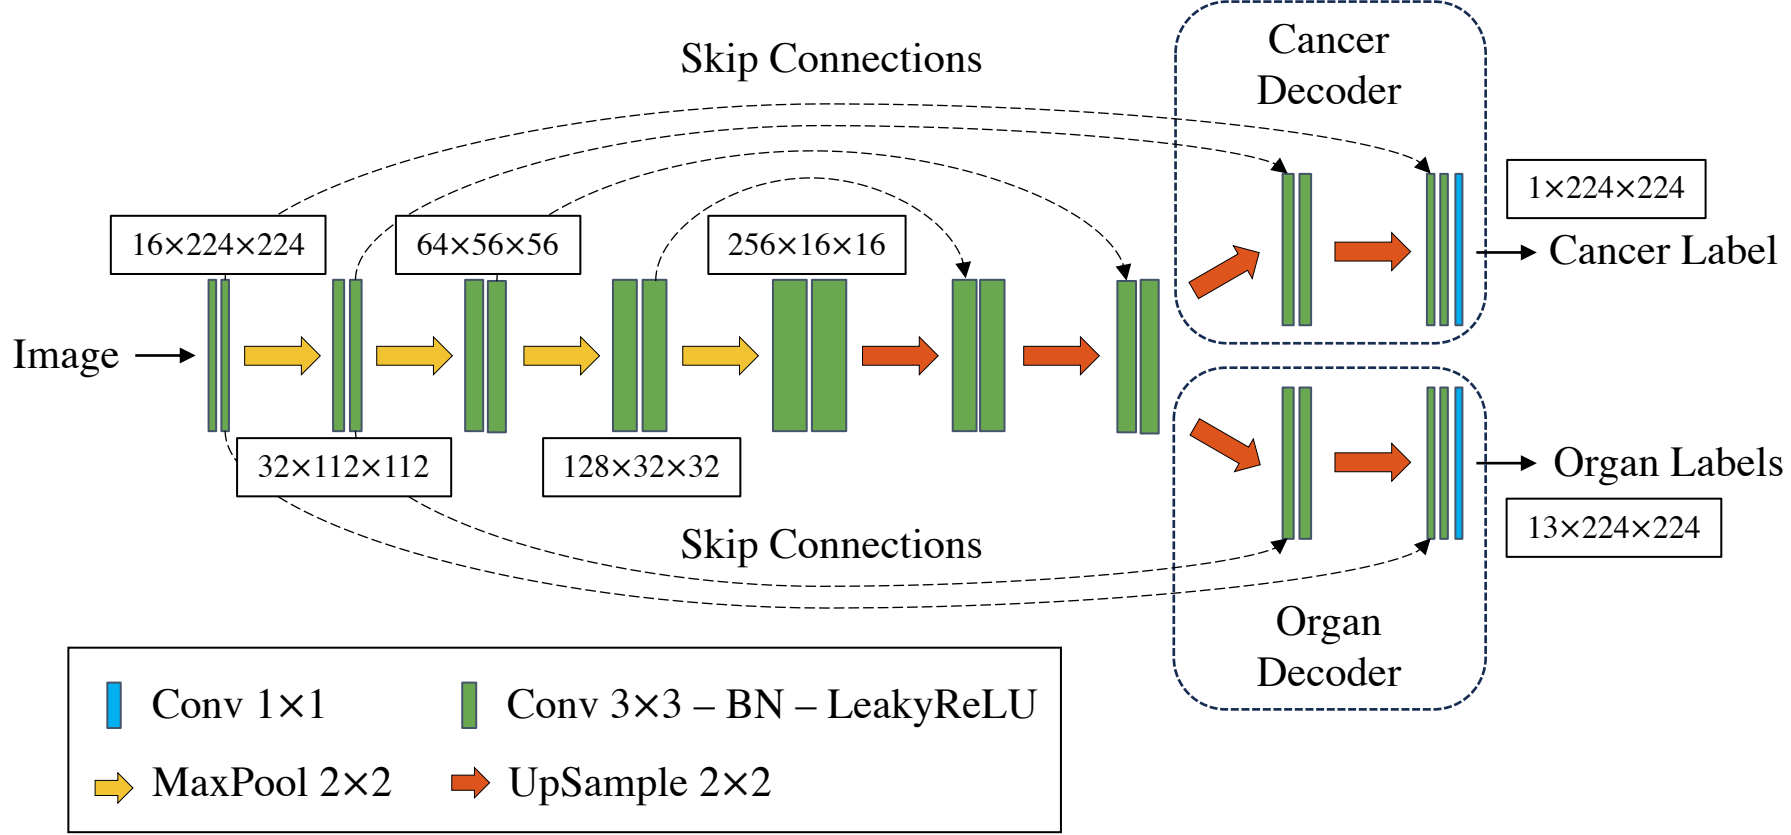

Supplement: supplementary_material [file attachment]

# 3D Models

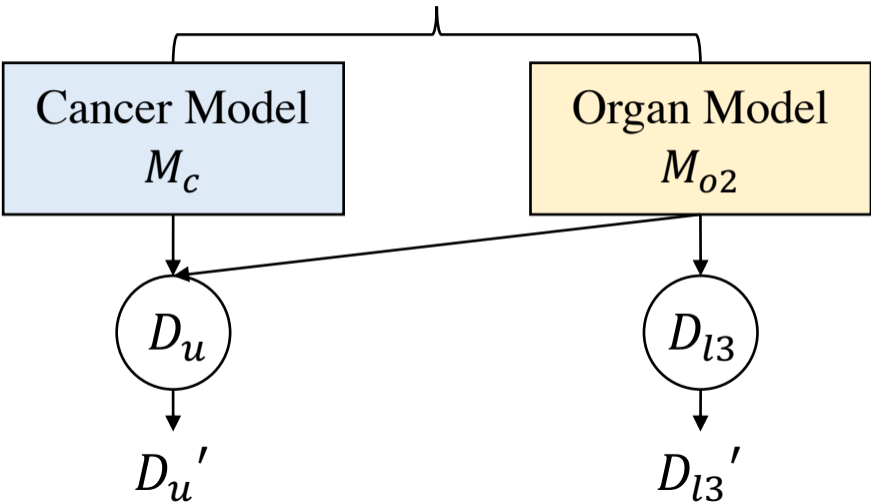

Supplement: supplementary_material [file attachment]

Step 1

$D_u'$

Model  
 $M_1$

Step 2

$D_{l3}'$

Model  
 $M_2$

Step 3

$D_{l1}$

Model  
 $M_3$

Step 4

$D_{l4}$

Model  
 $M_4$

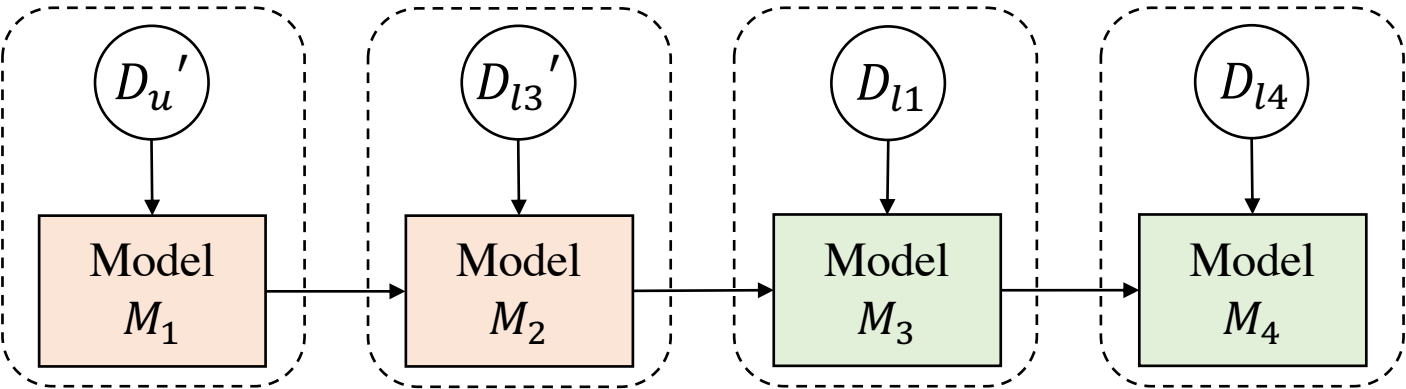

Supplement: supplementary_material [file attachment]

## Training

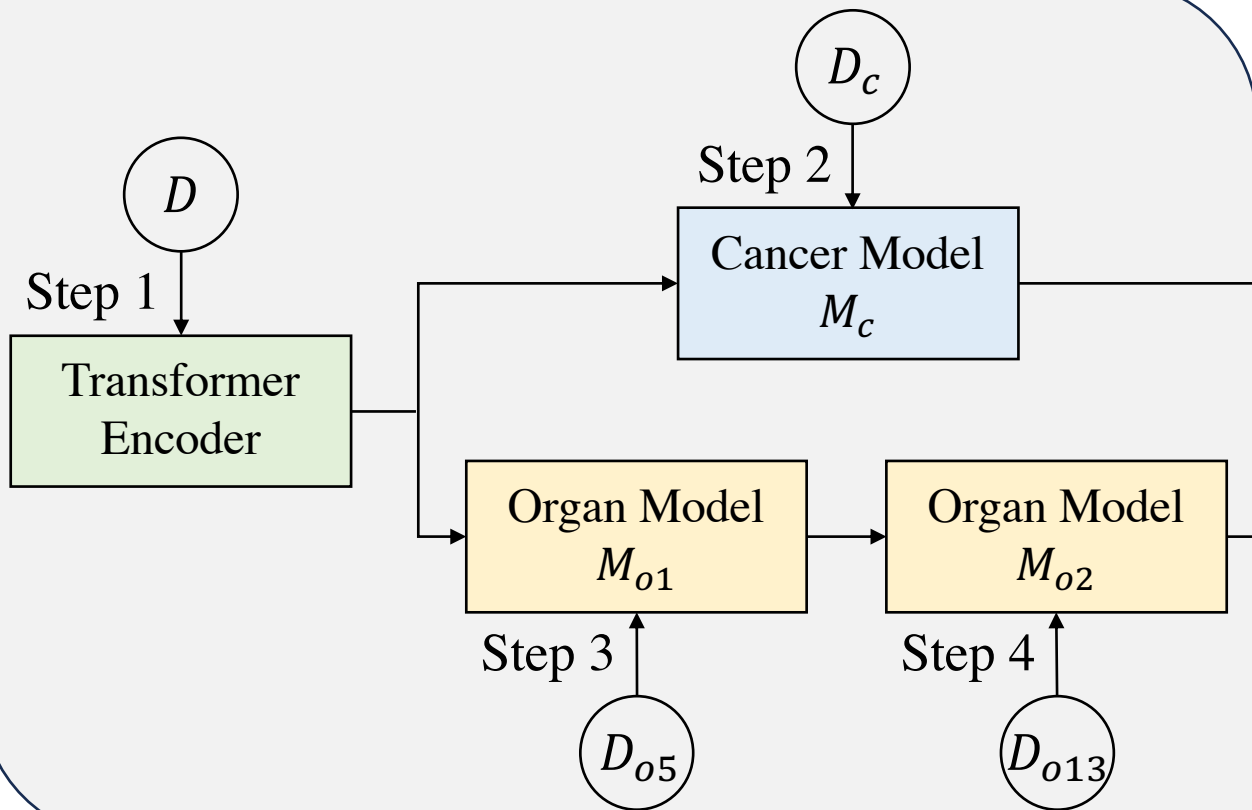

## Inferencing

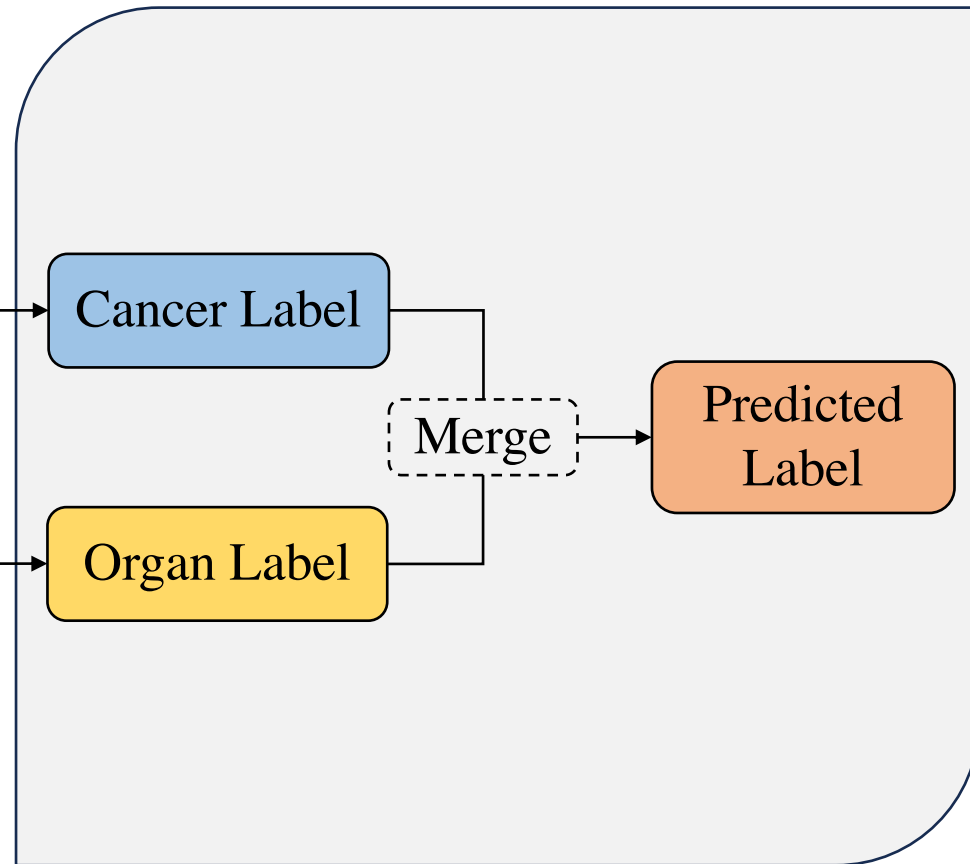

Supplement: supplementary_material [file attachment]

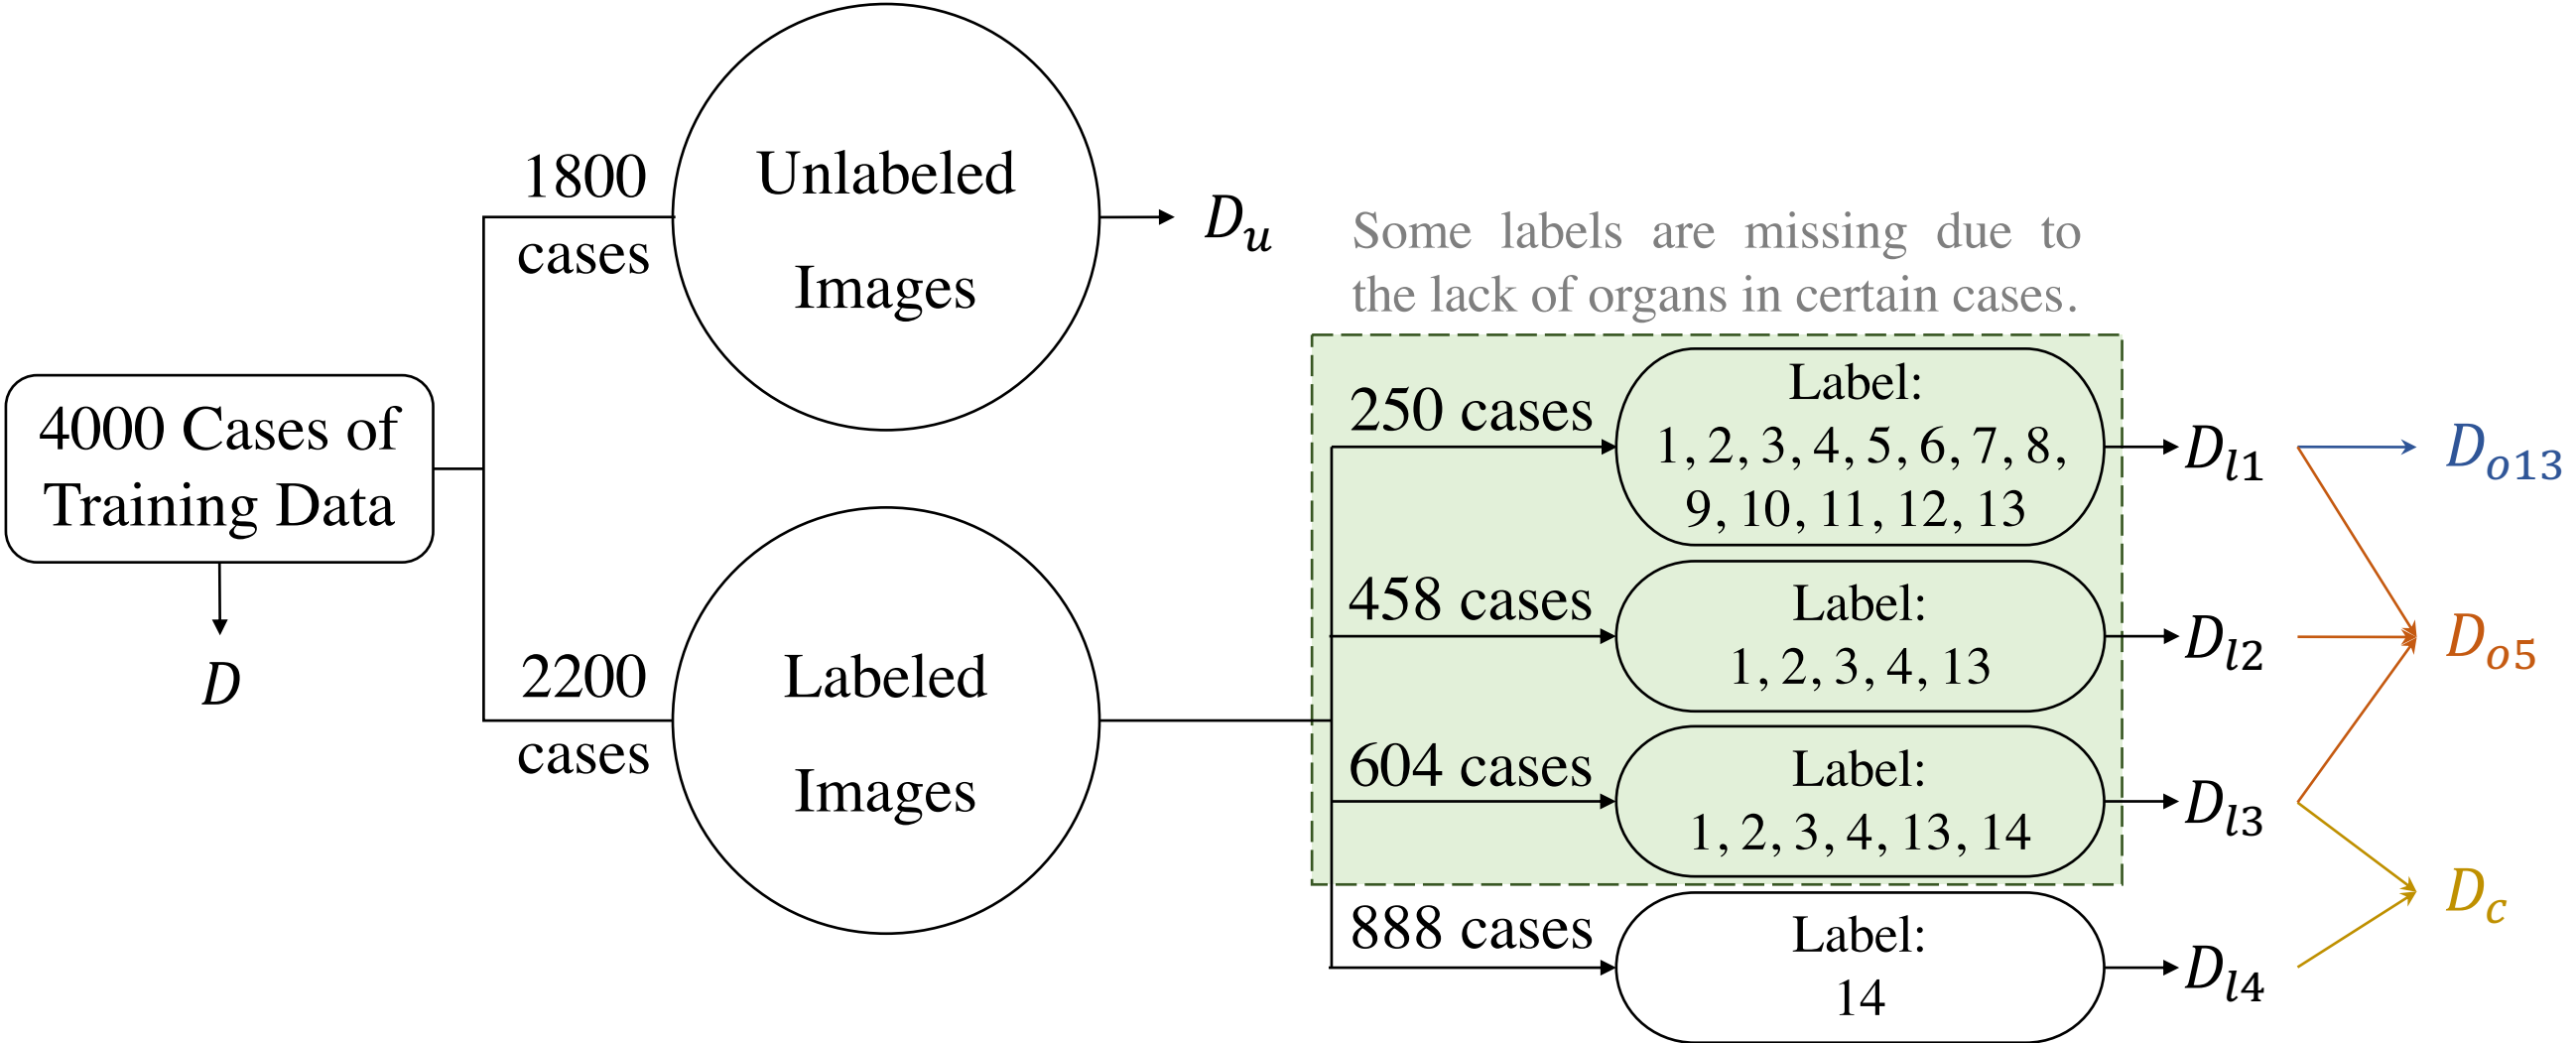

Supplement: supplementary_material [file attachment]
